# Supplementary material for: Genome evolution during bread wheat formation unveiled by the distribution dynamics of SSR sequences on chromosomes using FISH
Source: BMC Genomics. 2021 Jan 14;22:55. doi: 10.1186/s12864-020-07364-6 (PMC7809806; doi:10.1186/s12864-020-07364-6)
Supplement: Supplementary file 2 — Additional file 2. SSR sequence dynamics observed between wheat and its tetroploid progenitors. [file 12864_2020_7364_MOESM2_ESM.xlsx]

## Sheet: Sheet1
Additional file 2. SSR sequence dynamics observed between wheat and its tetroploid progenitors
SSR motifs	SSR sequence changes on wheat chromosomes compared with its tetroploid progenitors
	SSR sequence expansion	SSR sequence elimination	Both sequence expansion and elimination
AAC	chromosomes 1B, 2B, 7B and 2A	chromosomes 1B, 3B, 4B, 5B and 7B	chromosomes 2B
AAG	All A and B genome chromosomes
AGC	All B genome chromosomes, and chromosomes 4A, 6A and 7A
AG	chromosomes 6B	chromosomes 1B
